# Supplementary material for: Chains or rings? Polymorphism of an isoniazid derivative derivatized with diacetone alcohol
Source: Royal Society of Chemistry journal article supplement (doi:10.1039/d2ra02057b), 2022-01-01
Supplement: d2ra02057b3.pdf [file d2ra02057b3.pdf]

# Chains or Rings? Polymorphism of an isoniazid derivative derivatized with diacetone alcohol

Matthew C. Scheepers and Andreas Lemmerer\*<sup>‡</sup>

## Supplementary Information

### 1. Table S1 Crystallographic information for the crystal structures of Form I and Form II

| Crystal Form                 | Form I                                                        | Form II                                                       |
|------------------------------|---------------------------------------------------------------|---------------------------------------------------------------|
| Empirical formula            | C <sub>12</sub> H <sub>17</sub> N <sub>3</sub> O <sub>2</sub> | C <sub>12</sub> H <sub>17</sub> N <sub>3</sub> O <sub>2</sub> |
| Formula weight               | 235.28                                                        | 235.28                                                        |
| Temperature/K                | 173(2)                                                        | 173(2)                                                        |
| Crystal system               | Monoclinic                                                    | Monoclinic                                                    |
| Space group                  | C2/c                                                          | P2 <sub>1</sub> /c                                            |
| <i>a</i> /Å                  | 21.8108(4)                                                    | 9.2041(2)                                                     |
| <i>b</i> /Å                  | 7.0776(2)                                                     | 11.1274(3)                                                    |
| <i>c</i> /Å                  | 18.1625(5)                                                    | 11.9383(3)                                                    |
| <i>α</i> /°                  | 90                                                            | 90                                                            |
| <i>β</i> /°                  | 116.465(3)                                                    | 92.3570(10)                                                   |
| <i>γ</i> /°                  | 90                                                            | 90                                                            |
| Volume/Å <sup>3</sup>        | 2509.90(12)                                                   | 1221.66(5)                                                    |
| Z                            | 8                                                             | 4                                                             |
| Density/ g/cm <sup>3</sup>   | 1.245                                                         | 1.279                                                         |
| <i>μ</i> /mm <sup>-1</sup>   | 0.087                                                         | 0.089                                                         |
| F(000)                       | 1008                                                          | 504                                                           |
| Crystal size/mm <sup>3</sup> | 0.255 x 0.184 x 0.152                                         | 0.728 x 0.495 x 0.228                                         |

|                                                  |                                   |                                   |
|--------------------------------------------------|-----------------------------------|-----------------------------------|
| 2 $\theta$ range for data collection/ $^{\circ}$ | 2.086 to 28.420                   | 2.215 to 28.330                   |
| Reflections collected                            | 37052                             | 50485                             |
| Independent reflections                          | 3065 [ $R(\text{int}) = 0.1191$ ] | 3029 [ $R(\text{int}) = 0.0395$ ] |
| Goodness-of-fit on $F^2$                         | 0.863                             | 1.066                             |
| Final $R$ indexes [ $I > 2\sigma(I)$ ]           | $R_1 = 0.0452$ , $wR_2 = 0.0978$  | $R_1 = 0.0382$ , $wR_2 = 0.0896$  |
| Final $R$ indexes [all data]                     | $R_1 = 0.0933$ , $wR_2 = 0.1115$  | $R_1 = 0.0578$ , $wR_2 = 0.0987$  |
| CCDC                                             | 2133557                           | 2133558                           |

## 2. PXRD patterns

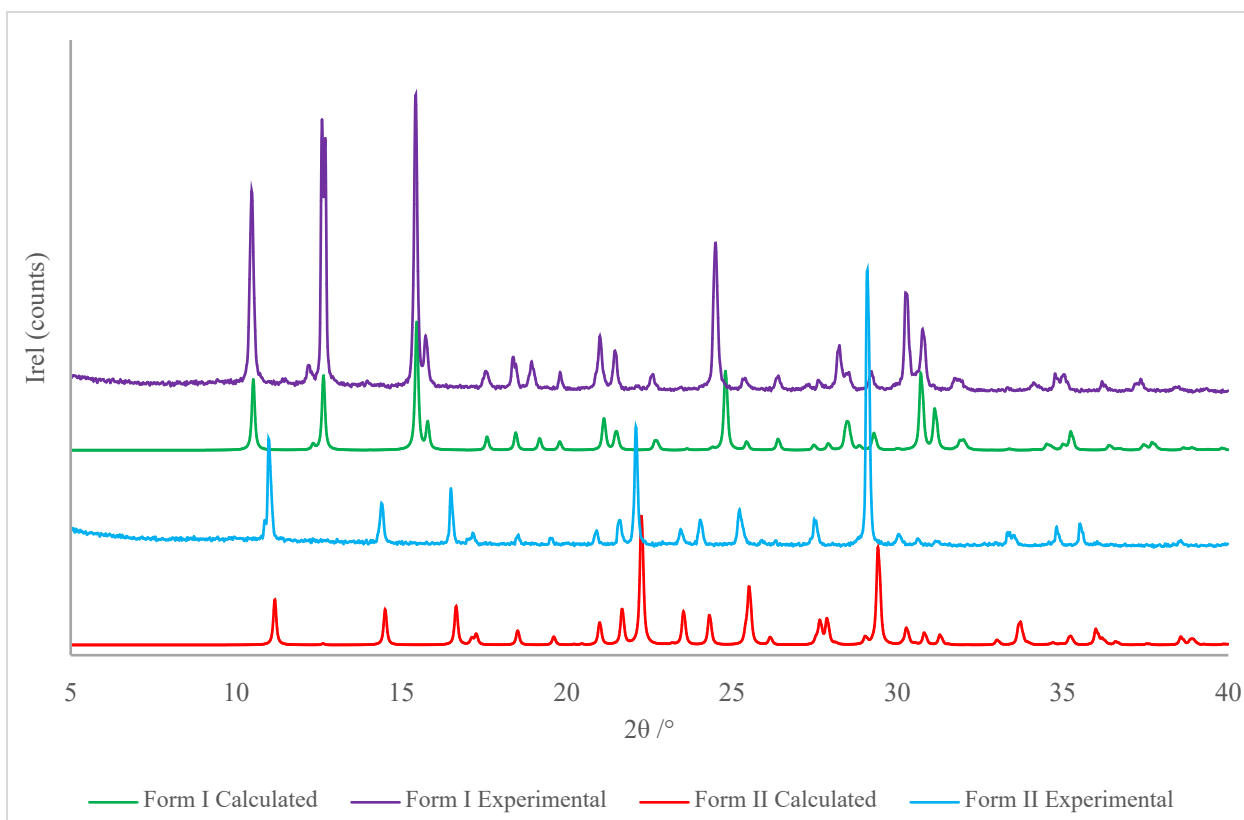

**Figure S1** PXRD Patterns for both **Form I** and **Form II**, calculated and experimental.

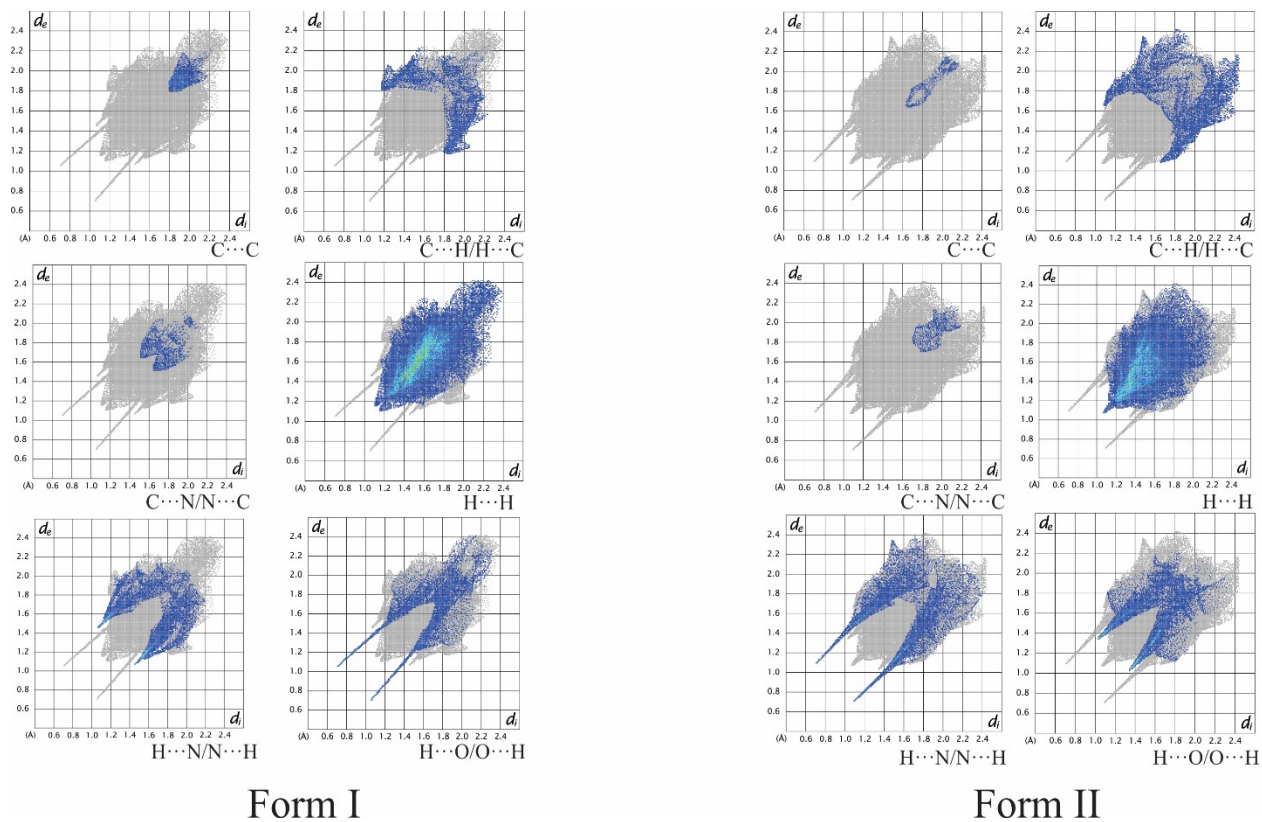

**Figure S2** Hirshfeld Surface Fingerprint spots for both **Form I** and **Form II**
